# Supplementary material
Source: MDPI journal article supplement (https://www.mdpi.com/2076-3417/10/12/4149)
Supplement: s1 [file s1]

# Supplementary Materials: Article The Use of a Two-Dimensional Electrical Resistivity Tomography (2D-ERT) As a Technique for Cadmium Determination in Cacao Crop Soils

Daniel Bravo and Javier Benavides-Eraza

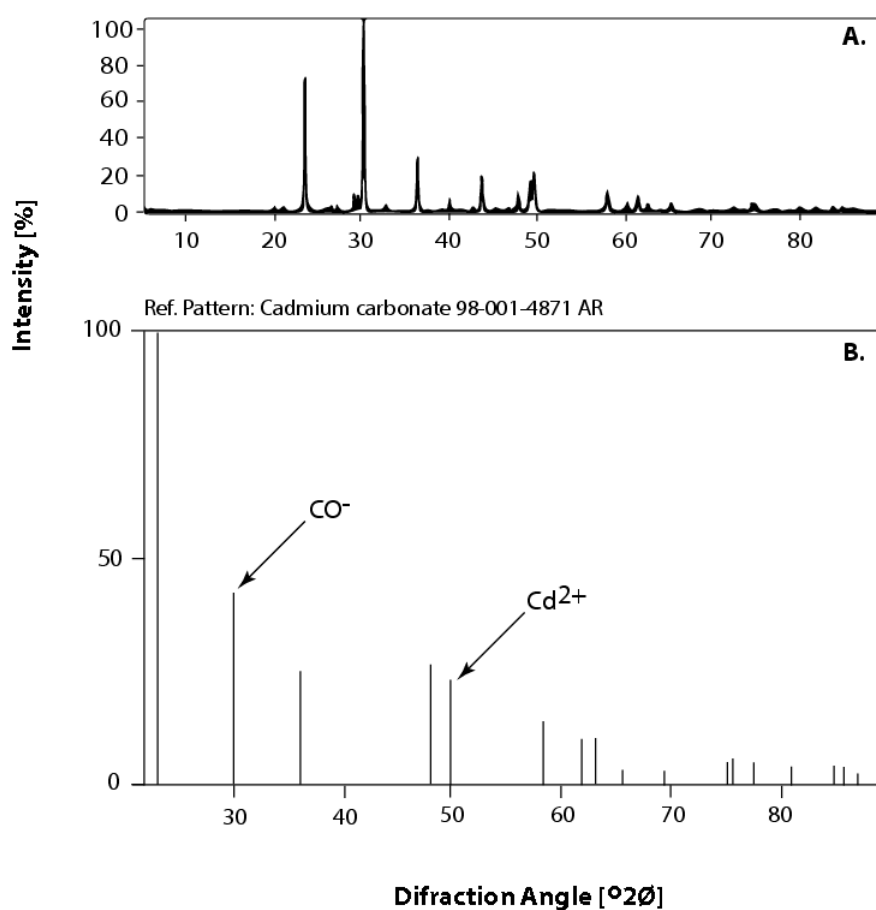

**Figure S1:** An X ray diffractogram (XRD) analysis of otavite confirmed in a cacao farm in Muzo, Boyacá. The Cd geomorphs were observed surrounding a cacao secondary root hair in topsoil (0.228 m soil depth).
